# Supplementary material for: Value construction through sequential sampling explains serial dependencies in decision making
Source: eLife journal article supplement (doi:10.7554/elife.96997), 2024-05-23
Supplement: supp1 [file elife-96997-supp1-v1.pdf]

| Cluster # | Regions in cluster                                                   | Cluster size | p-value | Peak Z | x    | y     | z    |
|-----------|----------------------------------------------------------------------|--------------|---------|--------|------|-------|------|
| 1         | R Parietal Operculum Cortex<br>R Planum Temporale                    | 58           | 0.00885 | 4.38   | 50.5 | -29   | 29.5 |
| 2         | L Superior Parietal Lobule                                           | 53           | 0.0149  | 4.08   | 29.5 | -42.5 | 56.5 |
| 3         | R Frontal Pole<br>R Frontal Medial Cortex<br>L Frontal Medial Cortex | 51           | 0.0184  | 4.28   | -0.5 | 56.5  | -9.5 |
