# Supplementary material for: Value construction through sequential sampling explains serial dependencies in decision making
Source: eLife journal article supplement (doi:10.7554/elife.96997), 2024-05-23
Supplement: supp2 [file elife-96997-supp2-v1.pdf]

| <i>s-value</i> of chosen item             |                                                                                                   |              |                        |        |       |       |       |
|-------------------------------------------|---------------------------------------------------------------------------------------------------|--------------|------------------------|--------|-------|-------|-------|
| Cluster #                                 | Regions in cluster                                                                                | Cluster size | p-value                | Peak Z | x     | y     | z     |
| 1                                         | R Lateral Occipital Cortex<br>R Angular Gyrus                                                     | 903          | $4.6 \times 10^{-23}$  | 4.79   | 40    | -66.5 | 50.5  |
| 2                                         | L Lateral Occipital Cortex<br>L Middle Temporal Gyrus<br>L Supramarginal Gyrus<br>L Angular Gyrus | 786          | $6.28 \times 10^{-21}$ | 4.74   | -45.5 | -54.5 | 59.5  |
| 3                                         | R Precuneous Cortex<br>L Precuneous Cortex<br>R Lateral Occipital Cortex                          | 242          | $6.09 \times 10^{-9}$  | 4.32   | 10    | -75.5 | 41.5  |
| 4                                         | R Inferior Temporal Gyrus<br>R Middle Temporal Gyrus                                              | 235          | $9.54 \times 10^{-9}$  | 4.77   | 58    | -56   | -12.5 |
| 5                                         | R Caudate                                                                                         | 116          | $4.76 \times 10^{-5}$  | 4.36   | 11.5  | 10    | -3.5  |
| 6                                         | L Caudate                                                                                         | 111          | $7.18 \times 10^{-5}$  | 4.13   | -9.5  | 10    | -0.5  |
| 7                                         | R Precuneous Cortex                                                                               | 80           | 0.00107                | 4.1    | 11.5  | -48.5 | 38.5  |
| 8                                         | L Precuneous Cortex<br>L Intracalcarine Cortex                                                    | 71           | 0.00248                | 4.43   | -14   | -62   | 11.5  |
| 9                                         | L Cingulate Gyrus                                                                                 | 49           | 0.023                  | 3.7    | -2    | -44   | 38.5  |
| 10                                        | R Middle Frontal Gyrus                                                                            | 43           | 0.0443                 | 4.07   | 40    | 13    | 53.5  |
| <i>d-value</i> of chosen item             |                                                                                                   |              |                        |        |       |       |       |
| Cluster #                                 | Regions in cluster                                                                                | Cluster size | p-value                | Peak Z | x     | y     | z     |
| 1                                         | L Precuneous Cortex                                                                               | 614          | $6.56 \times 10^{-17}$ | 4.38   | -11   | -71   | 29.5  |
| 2                                         | R Angular Gyrus<br>R Lateral Occipital Cortex<br>R Supramarginal Gyrus                            | 271          | $2.39 \times 10^{-9}$  | 4.65   | 52    | -56   | 14.5  |
| 3                                         | L Lateral Occipital Cortex                                                                        | 252          | $7.44 \times 10^{-9}$  | 4.29   | -41   | -75.5 | 29.5  |
| 4                                         | L Angular Gyrus<br>L Supramarginal Gyrus<br>L Lateral Occipital Cortex<br>L Supramarginal Gyrus   | 136          | $1.66 \times 10^{-5}$  | 4.05   | -57.5 | -56   | 38.5  |
| 5                                         | R Precuneous Cortex<br>R Cingulate Gyrus                                                          | 115          | $8.27 \times 10^{-5}$  | 4.09   | 11.5  | -50   | 41.5  |
| 6                                         | R Middle Temporal Gyrus<br>R Inferior Temporal Gyrus<br>R Lateral Occipital Cortex                | 103          | 0.000216               | 4.47   | 55    | -53   | 2.5   |
| 7                                         | L Caudate                                                                                         | 94           | 0.000455               | 4.46   | -9.5  | 10    | -0.5  |
| 8                                         | L Paracingulate Gyrus<br>L Frontal Pole                                                           | 88           | 0.000758               | 4.13   | -12.5 | 43    | -6.5  |
| 9                                         | R Supramarginal Gyrus<br>R Angular Gyrus                                                          | 72           | 0.00313                | 3.88   | 59.5  | -45.5 | 41.5  |
| 10                                        | L Middle Frontal Gyrus                                                                            | 50           | 0.0263                 | 4      | -29   | 13    | 53.5  |
| 11                                        | R Caudate                                                                                         | 45           | 0.0443                 | 4.14   | 11.5  | 10    | -3.5  |
| <i>(d-value - s-value)</i> of chosen item |                                                                                                   |              |                        |        |       |       |       |
| Cluster #                                 | Regions in cluster                                                                                | Cluster size | p-value                | Peak Z | x     | y     | z     |
| 1                                         | Parietal Operculum Cortex<br>Planum Temporale                                                     | 51           | 0.0182                 | 4.48   | 50.5  | -29   | 29.5  |
